# Supplementary material for: Biogenic Preparation and Characterization of Silver Nanoparticles from Seed Kernel of Mangifera indica and Their Antibacterial Potential against Shigella spp.
Source: MDPI journal article supplement (doi:10.3390/molecules28062468), 2023-03-08
Supplement: s1 [file s1]

## Supplementary material

**Table S1** Phytochemistry analysis of mango kernel ethanol extract

| <b>Biomolecules</b> | <b>Test</b>       | <b>Result</b>           | <b>Inference</b> |
|---------------------|-------------------|-------------------------|------------------|
| Phenols             | FeCl <sub>2</sub> | Bluish black colour     | +                |
| Saponins            | Foam test         | Foam persist for 15 min | -                |
| Alkaloids           | Mayer's test      | White ppt               | +                |
| Flavonoids          | Alkaline reagent  | Yellow colour           | +                |
| Tannins             | Ferric chloride   | Green or violet ppt     | +                |

**Table S2** MIC of MK-AgNPs MDR *Shigella* isolates

| Resistant<br><i>Shigella</i><br>isolates | Concentrations of MK-AgNPs (µg /mL) |    |    |    |    |    |    |    |    |    |     |
|------------------------------------------|-------------------------------------|----|----|----|----|----|----|----|----|----|-----|
|                                          | 0<br>(control)                      | 10 | 20 | 30 | 40 | 50 | 60 | 70 | 80 | 90 | 100 |
| S1                                       | +                                   | +  | -  | -  | -  | -  | -  | -  | -  | -  | -   |
| S2                                       | +                                   | -  | -  | -  | -  | -  | -  | -  | -  | -  | -   |
| S3                                       | +                                   | -  | -  | -  | -  | -  | -  | -  | -  | -  | -   |
| S4                                       | +                                   | +  | -  | -  | -  | -  | -  | -  | -  | -  | -   |

+ indicates bacterial growth   - indicates no growth.

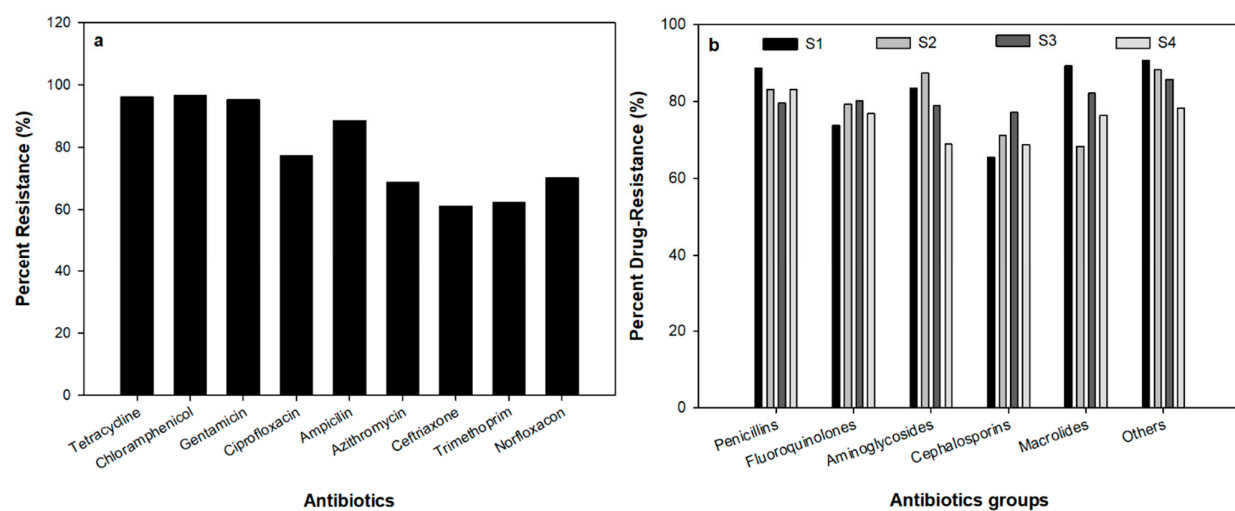

**Figure S1** (a) and (b) Resistant profile clinical *Shigella* isolates
